# Supplementary material
Source: PubMed Central journal article supplement (PMC8570701)
Supplement: mmc1.pdf [file mmc1.pdf]

# THE LANCET

## Rheumatology

### Supplementary appendix

This appendix formed part of the original submission and has been peer reviewed. We post it as supplied by the authors.

Supplement to: Sattui S E, Conway R, Putman M S, et al. Outcomes of COVID-19 in patients with primary systemic vasculitis or polymyalgia rheumatica from the COVID-19 Global Rheumatology Alliance physician registry: a retrospective cohort study. *Lancet Rheumatol* 2021; published online Nov 5. [https://doi.org/10.1016/S2665-9913\(21\)00316-7](https://doi.org/10.1016/S2665-9913(21)00316-7).

Supplementary Table 1. Baseline characteristics of patients with primary systemic vasculitis and polymyalgia with complete outcome data by disease subtypes at time of COVID-19 onset (n = 1020)

|                                | GCA         | AAV         | PMR         | Behcet's    | Other Vasculitis |
|--------------------------------|-------------|-------------|-------------|-------------|------------------|
| <b>N</b>                       | 158 (15.5)  | 294 (28.8)  | 323 (31.7)  | 97 (9.5)    | 148 (14.5)       |
| <b>Demographics</b>            |             |             |             |             |                  |
| Age (Mean, SD)                 | 75.1 (11.1) | 58.8 (16.9) | 72.7 (10.2) | 44.2 (12.6) | 52.5 (16.8)      |
| Sex                            |             |             |             |             |                  |
| Female                         | 98 (62.0)   | 167 (56.8)  | 193 (59.8)  | 57 (58.8)   | 101 (68.2)       |
| Male                           | 60 (38.0)   | 128 (43.2)  | 130 (40.2)  | 40 (41.2)   | 47 (31.8)        |
| Race                           |             |             |             |             |                  |
| White                          | 111 (70.3)  | 173 (58.8)  | 251 (77.7)  | 42 (43.3)   | 73 (49.3)        |
| Black                          | 0 (0.0)     | 3 (1.0)     | 4 (1.2)     | 0 (0.0)     | 6 (4.1)          |
| Latin American                 | 7 (4.4)     | 58 (19.7)   | 19 (5.9)    | 9 (9.3)     | 25 (16.9)        |
| Other                          | 6 (3.8)     | 30 (10.2)   | 17 (5.3)    | 24 (24.7)   | 26 (17.6)        |
| Missing                        | 34 (21.5)   | 30 (10.2)   | 32 (9.9)    | 22 (22.7)   | 18 (12.2)        |
| <b>Region</b>                  |             |             |             |             |                  |
| Europe                         | 122 (77.2)  | 158 (53.7)  | 215 (66.6)  | 61 (62.9)   | 74 (50.0)        |
| North America                  | 27 (17.1)   | 93 (31.6)   | 84 (26.0)   | 13(13.4)    | 44 (29.7)        |
| South America                  | 6 (3.8)     | 22 (7.5)    | 9 (2.8)     | 4 (4.1)     | 15 (10.1)        |
| Other                          | 3 (1.9)     | 21 (7.1)    | 15 (4.6)    | 19 (19.6)   | 15 (10.1)        |
| <b>Season</b>                  |             |             |             |             |                  |
| Before June 15                 | 78 (49.4)   | 101 (34.4)  | 136 (42.1)  | 44 (45.4)   | 62 (41.9)        |
| June 16-Sept 30                | 16 (10.1)   | 46 (15.7)   | 31 (9.6)    | 16 (16.5)   | 31 (21.0)        |
| Oct 1-April 12                 | 64 (40.5)   | 147 (50.0)  | 156 (48.3)  | 37 (38.1)   | 55 (37.2)        |
| <b>Number of Comorbidities</b> |             |             |             |             |                  |
| 0                              | 35 (22.2)   | 90 (30.6)   | 92 (28.5)   | 72 (74.2)   | 67 (45.3)        |
| 1                              | 54 (34.2)   | 91 (31.0)   | 128 (39.6)  | 16 (16.5)   | 51 (34.5)        |

|                                                                    |                 |                 |                 |                 |                 |
|--------------------------------------------------------------------|-----------------|-----------------|-----------------|-----------------|-----------------|
| ≥ 2                                                                | 69 (43.7)       | 113 (38.4)      | 103 (31.9)      | 9 (9.3)         | 30 (20.3)       |
| <b>Comorbidities</b>                                               |                 |                 |                 |                 |                 |
| Hypertension                                                       | 95 (60.1)       | 137 (46.6)      | 171 (52.9)      | 16 (16.5)       | 59 (39.9)       |
| Cardiovascular Disease                                             | 49 (31.0)       | 52 (17.7)       | 73 (22.6)       | 4 (4.1)         | 11 (7.4)        |
| Diabetes                                                           | 34 (21.5)       | 44 (15.0)       | 72 (22.3)       | 9 (9.3)         | 19 (12.8)       |
| Chronic Kidney Disease                                             | 16 (10.1)       | 80 (27.2)       | 26 (8.0)        | 1 (1.0)         | 12 (8.1)        |
| Lung Disease*                                                      | 29 (18.4)       | 80 (27.2)       | 44 (13.6)       | 6 (6.2)         | 23 (15.5)       |
| Interstitial Lung Disease                                          | 5 (3.2)         | 23 (7.8)        | 4 (1.2)         | 2 (2.1)         | 3 (2.0)         |
| Cancer                                                             | 12 (7.6)        | 15 (5.1)        | 27 (8.4)        | 1 (1.0)         | 10 (6.8)        |
| <b>BMI</b>                                                         |                 |                 |                 |                 |                 |
| Obese                                                              | 31 (19.6)       | 60 (20.4)       | 61 (18.9)       | 18 (18.6)       | 37 (25.0)       |
| <b>Smoking Status</b>                                              |                 |                 |                 |                 |                 |
| Ever                                                               | 36 (22.8)       | 63 (21.4)       | 74 (22.9)       | 14 (14.4)       | 30 (20.3)       |
| Never                                                              | 48 (30.4)       | 118 (40.4)      | 104 (32.2)      | 41 (42.3)       | 75 (50.7)       |
| Missing                                                            | 74 (46.8)       | 113 (38.4)      | 145 (44.9)      | 42 (43.3)       | 43 (29.1)       |
| <b>Glucocorticoid dose</b><br>(median, IQR) (excluding non-users)  | 9.0 (5.0, 17.5) | 5.0 (5.0, 16.0) | 5.0 (4.0, 10.0) | 7.3 (5.0, 10.0) | 7.0 (5.0, 17.5) |
| <b>Glucocorticoid use/dose</b><br><b>(prednisolone equivalent)</b> |                 |                 |                 |                 |                 |
| No glucocorticoid use                                              | 55 (34.8)       | 93 (31.6)       | 69 (21.4)       | 59 (60.8)       | 69 (46.6)       |
| 1 - 5 mg/day                                                       | 40 (25.3)       | 94 (32.0)       | 137 (42.4)      | 15 (15.5)       | 32 (21.6)       |
| 6 - 9 mg/day                                                       | 10 (6.3)        | 21 (7.1)        | 35 (10.8)       | 4 (4.1)         | 7 (4.7)         |
| ≥ 10 mg/day                                                        | 49 (31.0)       | 72 (24.5)       | 69 (21.4)       | 15 (15.5)       | 33 (22.3)       |
| Missing Glucocorticoids                                            | 4 (2.5)         | 14 (4.8)        | 13 (4.0)        | 4 (4.1)         | 7 (4.7)         |
| <b>Disease Activity</b>                                            |                 |                 |                 |                 |                 |
| Remission                                                          | 63 (39.9)       | 116 (39.5)      | 137 (42.4)      | 24 (24.7)       | 51 (34.5)       |
| Low                                                                | 43 (27.2)       | 91 (31.0)       | 110 (34.1)      | 42 (43.3)       | 44 (29.7)       |
| Moderate                                                           | 13 (8.2)        | 31 (10.5)       | 27 (8.4)        | 10 (10.3)       | 21 (14.2)       |
| High                                                               | 7 (4.4)         | 27 (9.2)        | 7 (2.2)         | 2 (2.1)         | 9 (6.1)         |

|                                   |           |            |            |           |           |
|-----------------------------------|-----------|------------|------------|-----------|-----------|
| Missing                           | 32 (20.3) | 29 (9.9)   | 42 (13.0)  | 19 (19.6) | 23 (15.5) |
| <b>Medication Category</b>        |           |            |            |           |           |
| No DMARD                          | 84 (53.2) | 71 (24.2)  | 233 (72.1) | 33 (34.0) | 55 (37.2) |
| csDMARD only                      | 31 (19.6) | 109 (37.1) | 77 (23.8)  | 32 (33.0) | 72 (48.7) |
| b/tsDMARDs only                   | 36 (22.8) | 87 (29.6)  | 7 (2.2)    | 16 (16.5) | 13 (8.8)  |
| b/tsDMARDs + csDMARDs combination | 7 (4.4)   | 27 (9.2)   | 6 (1.9)    | 16 (16.5) | 8 (5.4)   |
| Cyclophosphamide only             | 1 (0.6)   | 10 (3.4)   | 0 (0.0)    | 1 (1.0)   | 7 (4.7)   |

n (%) presented unless otherwise specified.

\*Interstitial lung disease, chronic obstructive pulmonary disease, asthma, or other lung diseases.

COVID-19, Coronavirus Disease 2019; AAV, ANCA-associated vasculitis; GCA, giant cell arteritis; PMR, polymyalgia rheumatica; csDMARDs, conventional synthetic disease-modifying antirheumatic drugs; b/tsDMARDs, biologic/targeted synthetic disease-modifying antirheumatic drugs; SD, standard deviation; ECMO, extracorporeal membrane oxygenation.

Supplementary Table 2. Multivariable<sup>†</sup> logistic regression analysis of factors associated with the ordinal COVID-19 severity outcome for patients with AAV including individual comorbidities

|                               | AAV<br>N= 264      |         |
|-------------------------------|--------------------|---------|
|                               | OR (95% CI)        | p-value |
| <b>Age</b> (per decade)       | 1.56 (1.29, 1.88)  | <0.01** |
| <b>Sex</b>                    |                    |         |
| Female                        | REF                |         |
| Male                          | 1.31 (0.77, 2.22)  | 0.31    |
| <b>Region</b>                 |                    |         |
| Europe                        | REF                |         |
| North America                 | 0.37 (0.20, 0.70)  | <0.01** |
| South America                 | 3.69 (1.26, 10.83) | 0.02*   |
| Other                         | 1.90 (0.73, 4.90)  | 0.19    |
| <b>Season</b>                 |                    |         |
| Prior to June 15, 2020        | REF                |         |
| June 16, 2020-Sept 30, 2020   | 1.00 (0.45, 2.23)  | 1.00    |
| Oct 1, 2020- April 12, 2021   | 0.39 (0.22, 0.69)  | <0.01** |
| <b>Medication Category</b>    |                    |         |
| No DMARD                      | REF                |         |
| Methotrexate                  | 0.83 (0.32, 2.19)  | 0.71    |
| Azathioprine                  | 0.90 (0.42, 1.90)  | 0.77    |
| Rituximab                     | 2.43 (1.27, 4.66)  | <0.01** |
| Cyclophosphamide              | 3.90 (0.89, 17.19) | 0.07    |
| <b>Hypertension</b>           | 0.98 (0.56, 1.71)  | 0.95    |
| <b>Cardiovascular Disease</b> | 0.87 (0.43, 1.76)  | 0.71    |
| <b>Diabetes</b>               | 0.80 (0.38, 1.67)  | 0.55    |
| <b>Chronic Kidney Disease</b> | 2.12 (1.17, 3.84)  | 0.01*   |
| <b>Lung Disease</b>           | 1.06 (0.60, 1.85)  | 0.85    |
| <b>Smoking</b>                | 1.13 (0.60, 2.13)  | 0.71    |
| <b>Obesity</b>                | 1.92 (0.99, 3.73)  | 0.05    |
| <b>Glucocorticoid</b>         |                    |         |
| No glucocorticoid use         | REF                |         |
| 1-5 mg/day                    | 1.57 (0.84, 2.91)  | 0.15    |
| 6-9 mg/day                    | 0.57 (0.20, 1.68)  | 0.31    |
| ≥ 10 mg/day                   | 2.71 (1.28, 5.76)  | 0.01*   |
| <b>Disease Activity</b>       |                    |         |
| Minimal or Low                | REF                |         |
| Moderate or Severe            | 2.27 (1.12, 4.61)  | 0.02*   |

†Adjusted for sex, age, region, season, medication category, hypertension, cardiovascular disease, diabetes, chronic kidney disease, lung disease, smoking, obesity, glucocorticoid use, and disease activity.

\*  $p < 0.05$

\*\*  $p < 0.01$

COVID-19, Coronavirus Disease 2019; DMARDs, disease-modifying antirheumatic drugs; AAV, ANCA-associated vasculitis

## **Appendix. COVID-19 Global Rheumatology Alliance Collaborators**

Brahim Dahou (Association Rhumatologues Algériens Privés; Algeria), Eva Rath (Hanusch Krankenhaus; Austria), Yves Piette (AZ Sint-Jan Brugge; Belgium), Mieke Devinck (AZ Sint-Lucas Brugge; Belgium), Bea Maeyaert (AZ Sint-Lucas Brugge; Belgium), Francinne M Ribeiro (Hospital Universitário Pedro Ernesto Universidade do Estado do Rio de Janeiro; Brazil), Sandra Lucia Euzebio Ribeiro (Federal University of Amazonas; Brazil), Marcelo Pinheiro (Universidade Federal De São Paulo Escola Paulista de Medicina e Escola Paulista de Enfermagem; Brazil), Rosana Quintana (Argentine Society of Rheumatology, Argentina), Gimena Gomez (Research Unit Argentine Society of Rheumatology; Argentina), Karen Roberts (Argentine Society of Rheumatology, Argentina), Roberto Miguel Baez (Argentine Society of Rheumatology, Argentina), Vanessa Castro Coello (Argentine Society of Rheumatology, Argentina), Maria Jezabel Haye Salinas (Reumatologa CEMMA, Universidad Nacional de La Rioja; Argentina), Federico Nicolas Maldonado (Sanatorio Guemes; Argentina), Alvaro Andres Reyes Torres (Argentine Society of Rheumatology, Argentina), Gelsomina Alle (Argentine Society of Rheumatology, Argentina), Romina Tanten (Argentine Society of Rheumatology, Argentina), Hernan Maldonado Ficco (Argentine Society of Rheumatology, Argentina), Romina Nieto (Argentine Society of Rheumatology, Argentina), Carla Gobbi (Argentine Society of Rheumatology, Argentina), Yohana Tissera (Argentine Society of Rheumatology, Argentina), Cecilia Pisoni (Argentine Society of Rheumatology, Argentina), Alba Paula (Argentine Society of Rheumatology, Argentina), Juan Alejandro Albiero (Argentine Society of Rheumatology, Argentina), Maria Marcela Schmid (Argentine Society of Rheumatology, Argentina), Micaela Cosatti (Argentine Society of Rheumatology, Argentina), Maria Julieta Gamba (Argentine Society of Rheumatology, Argentina), Carlevaris Leandro (Argentine Society of Rheumatology, Argentina), Maria Alejandra Cusa (Argentine Society of Rheumatology, Argentina), Noelia German (Argentine Society of Rheumatology, Argentina), Veronica Bellomio (Argentine Society of Rheumatology, Argentina), Lorena Takashima (Argentine Society of Rheumatology, Argentina), Mariana Pera (Argentine Society of Rheumatology, Argentina), Karina Cogo (Argentine Society of Rheumatology, Argentina), Marisa Soledad Galvez Elkin (Argentine Society of Rheumatology, Argentina), Maria Alejandra Medina (Argentine Society of Rheumatology, Argentina), Veronica Savio (Argentine Society of Rheumatology, Argentina), Ivana Romina Rojas Tessel (Argentine Society of Rheumatology, Argentina), Rodolfo Perez Alamino (Argentine Society of Rheumatology, Argentina), Marina Laura Werner (Argentine Society of Rheumatology, Argentina), Sofia Ornella (Argentine Society of Rheumatology, Argentina), Luciana Casalla (Argentine Society of Rheumatology, Argentina), Maria de la Vega (Argentine Society of Rheumatology, Argentina), Maria Severina (Argentine Society of Rheumatology, Argentina), Mercedes Garcia (Argentine Society of Rheumatology, Argentina), Luciana Gonzalez Lucero (Argentine Society of Rheumatology, Argentina), Cecilia Romeo (Argentine Society of Rheumatology, Argentina), Sebastián Moyano (Argentine Society of Rheumatology, Argentina), Tatiana Barbich (Argentine Society of Rheumatology, Argentina), Ana Bertoli (Argentine Society of Rheumatology, Argentina), Andrea Baños (Argentine Society of Rheumatology, Argentina), Sandra Petruzzelli (Argentine Society of Rheumatology, Argentina), Carla Matellan (Argentine Society of Rheumatology, Argentina), Silvana Conti (Argentine Society of Rheumatology, Argentina), Ma. Alicia Lazaro (Argentine Society of

Rheumatology, Argentina), Gustavo Fabián Rodríguez Gil (Argentine Society of Rheumatology, Argentina), Fabian Risueño (Argentine Society of Rheumatology, Argentina), Maria Isabel Quaglia (Argentine Society of Rheumatology, Argentina), Julia Scafati (Argentine Society of Rheumatology, Argentina), Natalia Lili Cuchiari (Argentine Society of Rheumatology, Argentina), Jonathan Eliseo Rebak (Argentine Society of Rheumatology, Argentina), Susana Isabel Pineda (Argentine Society of Rheumatology, Argentina), María Elena Calvo (Argentine Society of Rheumatology, Argentina), Eugenia Picco (Argentine Society of Rheumatology, Argentina), Josefina Gallino Yanzi (Argentine Society of Rheumatology, Argentina), Pablo Maid (Argentine Society of Rheumatology, Argentina), Debora Guaglianone (Argentine Society of Rheumatology, Argentina), Julieta Silvana Morbiducci (Argentine Society of Rheumatology, Argentina), Sabrina Porta (Argentine Society of Rheumatology, Argentina), Natalia Herscovich (Argentine Society of Rheumatology, Argentina), José Luis Velasco Zamora (Argentine Society of Rheumatology, Argentina), Boris Kisluk (Argentine Society of Rheumatology, Argentina), Maria Sol Castaños Menescardi (Argentine Society of Rheumatology, Argentina), Rosana Gallo (Argentine Society of Rheumatology, Argentina), María Victoria Martire (Argentine Society of Rheumatology, Argentina), Carla Maldini (Argentine Society of Rheumatology, Argentina), Cecilia Goizueta (Argentine Society of Rheumatology, Argentina), Sabrina Solange de la Vega Fernandez (Argentine Society of Rheumatology, Argentina), Carolina Aeschlimann (Argentine Society of Rheumatology, Argentina), Gisela Subils (Argentine Society of Rheumatology, Argentina), Sebastián Ibáñez (Clínica Alemana de Santiago, Chile), Anne-Marie Chassin-Trubert (Complejo Hospitalario San José; Chile), Lingli Dong (Tongji Hospital, China), Lui Cajas (Clinica Universitaria Colombia - Centro Medico Providencia Sanitas; Colombia), Marko Barešić (University Hospital Center Zagreb; Croatia), Branimir Anić (University Hospital Center Zagreb ; Croatia), Melanie-Ivana Čulo (University Hospital Dubrava; Croatia), Tea Ahel Pavelić (Clinical Hospital Center; Croatia), Kristina Kovačević Stranski (University Hospital Osijek; Croatia), Boris Karanovic (UHC Zagreb; Croatia), Jiri Vencovsky (Institute of Rheumatology; Czechia), Marta Píchová (Medipont plus s.ro.; Czechia), Maria Filkova (Institute of Rheumatology; Czechia), Hesham Hamoud (Al Azhar University Hospitals; Egypt), Dimitrios Vassilopoulos (Hippokration General Hospital; Greece), Gabriela MG Melgar (Hospital del Valle; Honduras), Ho So (Chinese University of Hong Kong; Hong Kong), Márta Király (Petz Aladár University Teaching Hospital; Hungary), Mahdi Vojdanian (Iran Rheumatology Center; Iran), Alexandra Balbir-Gurman (Rambam Rheumatology Institute; Israel), Fatemah Abutiban (Kuwait Rheumatology Association; Kuwait), Julija Zepa (Pauls Stradins Clinical University Hospital; Latvia), Inita Bulina (Pauls Stradins Clinical University hospital; Latvia), Loreta Bukauskiene (Klaipeda University Hospital; Lithuania), Beatriz Elena Zaueta-Montiel (Centro Medico del Angel; Mexico), Deshiré Alpízar-Rodríguez (Mexican College of Rheumatology; Mexico), Marina Rull-Gabayet (Instituto Nacional de Ciencias Médicas y Nutrición Salvador Zubirán; Mexico), Fedra Irazoque (Private Practice; Mexico), Xochitl Jimenez (Centro Medico Naval; Mexico), Eduardo Martín-Nares (Instituto Nacional de Ciencias Médicas y Nutrición Salvador Zubirán; Mexico), Angel Castillo-Ortiz (Centro Medico Las Americas; Mexico), Tatiana S Rodriguez-Reyna (Instituto Nacional de Ciencias Médicas y Nutrición Salvador Zubirán; Mexico), Diana C Rosete (Instituto Nacional de Ciencias Médicas y Nutrición Salvador Zubirán; Mexico), Erick A Zamora-Tehozol (Centro Medico Pensiones; Mexico), David Vega-Morales (Hospital General de Zona #17; Mexico), Lenny Geurts-van Bon (Ziekenhuisgroep Twente; Netherlands), Theo



Zijlstra (Isala Hospital; Netherlands), Monique Hoekstra (Isala Hospital; Netherlands), Nasra Al-Adhoubi (Royal Hospital; Oman), Babur Salim (Fauji Foundation Hospital; Pakistan), Enrique Giraldo (Complejo Hospitalario; Panama), Ariel Salinas (Hospital Essalud Alberto Sabogal Sologuren; Peru), Manuel Ugarte-Gil (Universidad Científica del Sur-Hospital Guillermo Almenara Irigoyen; Peru), Jarosław Nowakowski (University Hospital, Krakow; Poland), Samar Al-Emadi (Hamad Medical Corporation; Qatar), Richard Conway (St. James's Hospital; Republic of Ireland), Rachael Flood (Tallaght University Hospital; Republic of Ireland), Geraldine McCarthy (Mater Misericordiae University Hospital; Republic of Ireland), Ioana Felea (County Emergency Hospital; Romania), Ileana Filipescu (County Emergency Hospital; Romania), Simona Rednic (County Emergency Hospital; Romania), Laura Groseanu (Sf Maria Clinical Hospital; Romania), Maria Magdalena Tamas (County Emergency Hospital; Romania), Vanda Mlynarikova (National Institute of Rheumatic Diseases; Slovak Republic), Martina Skamlova (FNŠPFDR, Banská Bystrica; Slovak Republic), Martin Zlnay (National Institute of Rheumatic Diseases; Slovak Republic), Dagmar Mičeková (National Institute of Rheumatic Diseases; Slovak Republic), Lubica Capova (University Hospital, Bratislava; Slovak Republic), Zelmira Macejova (University Hospital, Košice; Slovak Republic), Emőke Šteňová (University Hospital Bratislava; Slovak Republic), Helena Raffayova (National Institute of Rheumatic Diseases; Slovak Republic), Gabriela Belakova (Medman s.r.o.; Slovak Republic), Eva Strakova (Faculty hospital Prešov; Slovak Republic), Marieta Senčarová (Louis Pasteur University Hospital; Slovak Republic), Soňa Žlnayová (Poliklinika MarMedico, s.r.o.; Slovak Republic), Anna Sabová (Súkromná Reumatologická Ambulancia; Slovak Republic), Daniela Spisakova (University Hospital od L. Pasteur Kosice; Slovak Republic), Mária Oetterová (Safarik University hospital; Slovak Republic), Olga Lukacova (National Institute of Rheumatic Diseases; Slovak Republic), Martina Bakosova (UNB Nemocnica Stare Mesto; Slovak Republic), Alojzija Hocevar (UMC Ljubljana; Slovenia), Juan J Alegre-Sancho (Hospital Universitari Dr Peset; Spain), Montserrat C Coro (Complejo Asistencial de Ávila; Spain), Natalia de la Torre-Rubio (Hospital Universitario Puerta de Hierro Majadahonda; Spain), Jose C Esteban (Hospital Universitario Puerta de Hierro; Spain), Maria del Carmen T Martin (HOSPITAL NUESTRA SEÑORA SONSOLES; Spain), Jose G Puerta (Hospital Clinic; Spain), Juan Carlos Cobeta Garcia (Hospital Esnest Lluch; Spain), Servet Akar (Izmir Katip Celebi University Atatürk Training and Research Hospital; Turkey), Ozan C Icacan (Bakirköy Dr.Sadi Konuk Research and Training Hospital; Turkey), Gozd Kubra Yardımcı (Hacettepe University Faculty of Medicine; Turkey), Selda Çelik (Bakirkoy Dr. Sadi Konuk Education and Research Hospital; Turkey), Viktoriia Vasylets (Multifield Medical Centre; Ukraine), Jane Leeder (Norfolk & Norwich University Hospital; UK), Laura Chadwick (St Helens & Knowsley NHS Trust; UK), Kirsty Devine (York Hospital; UK), Sasha Dunt (Countess of Chester NHS Foundation Trust; UK), Lucia Fusi (King's College Hospital; UK), Caroline M Jones (Llandudno Hospital; UK), Elizabeth Macphie (Lancashire and South Cumbria NHS Foundation Trust; UK), Elena Nikiphorou (King's College Hospital; UK), Christine Graver (Hampshire Hospitals NHS Trust; UK), Diana O'Kane (Royal National Hospital For Rheumatic Diseases at Royal United Hospital; UK), Katie Williams (York District Hospital; UK), Sheila O'Reilly (Royal Derby Hospital; UK), Samir Patel (Queen Elizabeth hospital; UK), Rosaria Salerno (King's College Hospital; UK), Lucy Thornton (Bradford Royal Infirmary; UK), James Pilcher (University Hospital Lewisham; UK), Jenny Tyler (Royal United Hospital, Bath;

UK), Claire Vandeveld (Leeds Teaching Hospitals Trust; UK), Elizabeth Warner (Lister Hospital; UK), Su-Ann Yeoh (University College London Hospitals NHS Foundation Trust; UK), Caroline Mulvaney Jones (Llandudno Hospital; UK), Beverley Harrison (Salford Royal NHS FT; UK), Audrey Low (Salford Royal NHS FT; UK), Sarah Horton (Minerva Health Centre; UK), Sara Baig (Arthritis and Rheumatology Consultants, PA; USA), Hammad Bajwa (Arthritis and Rheumatology Consultants, PA; USA), Byung Ban (Medstar Georgetown University Hospital; USA), Vernon Berglund (Arthritis and Rheumatology Consultants, PA; USA), Cassandra Calabrese (Cleveland Clinic; USA), Kristin D'Silva (Brigham and Women's Hospital; USA), Angela Dahle (Arthritis and Rheumatology Consultants, PA; USA), Kathryn Dao (UT Southwestern Medical Center; USA), Nicole Daver (Institute of Rheumatic and Autoimmune Diseases; USA), William Davis (Ochsner Medical Center Rheumatology Department; USA), Walter Dorman (Arthritis and Rheumatology Consultants, PA; USA), Ezzati Fatemeh (UT Southwestern Medical Center; USA), Theodore Fields (Hospital for Special Surgery; USA), Jody Hargrove (Arthritis and Rheumatology Consultants, PA; USA), Melissa Harvey (Institute of Rheumatic and Autoimmune Diseases; USA), Maren Hilton (Arthritis and Rheumatology Consultants, PA; USA), Tiffany Hsu (Brigham and Women's Hospital; USA), Arundathi Jayatilleke (Temple University Hospital; USA), David Karp (UT Southwestern Medical Center; USA), Gilbert Kepecs (Private Practice; USA), Neil Kramer (Institute of Rheumatic and Autoimmune Diseases; USA), Concetta Lamore (Institute of Rheumatic and Autoimmune Diseases; USA), Nicholas Lebedoff (Arthritis and Rheumatology Consultants, PA; USA), Susan Leonard (Arthritis and Rheumatology Consultants, PA; USA), Sushama Mody (Riverside Medical Group; USA), Jennifer Morgan (Arthritis and Rheumatology Consultants, PA; USA), Emily Pfeifer (Arthritis and Rheumatology Consultants, PA; USA), Guillermo Quiceno (UT Southwestern Medical Center; USA), Robert Quinet (Ochsner Medical Center Rheumatology Department; USA), Elliot Rosenstein (Institute of Rheumatic and Autoimmune Diseases; USA), Eric Ruderman (Northwestern Memorial; USA), Evangeline Scopelitis (Ochsner Medical Center Rheumatology Department; USA), Naomi Patel (Brigham and Women's Hospital; USA), Jeffrey Sparks (Brigham and Women's Hospital; USA), Zachary Wallace (Brigham and Women's Hospital; USA), Faizah Siddique (Loyola University Medical Center; USA), Caroline Siegel (Hospital for Special Surgery; USA), Archibald Skemp (Arthritis and Rheumatology Consultants, PA; USA), Derrick Todd (Brigham and Women's Hospital; USA), Karen T Toribio (Ochsner Medical Center Rheumatology Department; USA), Rachel Wallwork (Brigham and Women's Hospital; USA), Tameka Webb-Detiege (Ochsner Medical Center Rheumatology Department; USA), Douglas White (Gundersen Health System; USA), Jeffrey Wilson (Arthritis and Rheumatology Consultants, PA; USA), Melanie Winter (Gundersen Health System; USA), Leanna Wise (Los Angeles County + USC Medical Center; USA), Anne Wolff (Arthritis and Rheumatology Consultants, PA; USA), Jerald Zakem (Ochsner Medical Center Rheumatology Department; USA), JoAnn Zell (University of Colorado; USA), Kurt Zimmerman (Arthritis and Rheumatology Consultants, PA; USA), Shraddha Jatwani (Albert Einstein Medical Center; USA), Eduardo Cepeda (Austin Diagnostic Clinic, USA), Denise Hare (Capital Health Rheumatology, USA), Christopher Adams (East Alabama Medical Center; USA), Arezou Khosroshahi (Emory University; USA), Adam Kilian (George Washington University; USA), Suneya Hogarty (Integrative Arthritis and Pain Consultants; USA), Karen Yeter (Kaiser Permanente; USA), Tamar Tanner (Montefiore Medical Center; USA), Khurram Abbas (USA),

Gilbert Kepecs (USA), Lilliam Miranda (Rheumatology Center INC; USA), Michael Guma (Riverside Medical Group; USA), Ammar Haikal (Riverside Medical Group; USA), Daric Mueller (Shores Rheumatology PC; USA), Allison Bays (University of Washington; USA), Deborah Parks (Washington University; USA).
